# Supplementary material
Source: HighWire-hosted journal article supplement (https://cmaj.ca/highwire/filestream/58922/field_highwire_adjunct_files/5/chronic-akbaraly-6-at.pdf)
Supplement: chronic-akbaraly-6-at.pdf [file chronic-akbaraly-6-at.pdf]

**Appendix 6:** Full adjusted\* association between interleukin-6 levels over the 5-yr exposure period (5 yr before baseline and at baseline) and subsequent aging phenotypes at 10-yr follow-up — sensitivity analyses

| No. of times interleukin-6 was high over the 5-yr exposure period† | Successful aging    |                  | Fatal or nonfatal CVD events |                  | Non-CVD death       |                  |
|--------------------------------------------------------------------|---------------------|------------------|------------------------------|------------------|---------------------|------------------|
|                                                                    | <i>No. of cases</i> | OR (95% CI)      | <i>No. of cases</i>          | OR (95% CI)      | <i>No. of cases</i> | OR (95% CI)      |
| After excluding the 361 obese participants                         |                     |                  |                              |                  |                     |                  |
| 0                                                                  | 505                 | 1.00 (ref)       | 157                          | 1.00 (ref)       | 63                  | 1.00 (ref)       |
| 1                                                                  | 127                 | 0.68 (0.54–0.86) | 84                           | 1.38 (1.03–1.84) | 31                  | 1.19 (0.75–1.87) |
| 2                                                                  | 43                  | 0.62 (0.44–0.89) | 40                           | 1.34 (0.89–2.01) | 27                  | 2.09 (1.26–3.49) |
| After excluding the 295 participants using anti-inflammatory drugs |                     |                  |                              |                  |                     |                  |
| 0                                                                  | 501                 | 1.00 (ref)       | 143                          | 1.00 (ref)       | 61                  | 1.00 (ref)       |
| 1                                                                  | 137                 | 0.67 (0.54–0.84) | 85                           | 1.37 (1.04–1.81) | 33                  | 1.34 (0.88–2.02) |
| 2                                                                  | 46                  | 0.54 (0.38–0.76) | 52                           | 1.64 (1.14–2.35) | 29                  | 2.44 (1.55–3.82) |
| After excluding the 86 participants with acute inflammation        |                     |                  |                              |                  |                     |                  |
| 0                                                                  | 525                 | 1.00 (ref)       | 164                          | 1.00 (ref)       | 67                  | 1.00 (ref)       |
| 1                                                                  | 141                 | 0.66 (0.53–0.81) | 93                           | 1.44 (1.07–1.94) | 40                  | 1.24 (0.80–1.94) |
| 2                                                                  | 46                  | 0.53 (0.38–0.75) | 51                           | 1.77 (1.22–2.58) | 36                  | 2.13 (1.30–3.49) |

Note: CI = confidence interval, CVD = cardiovascular, OR = odds ratio.

\*Three sets of sensitivity analyses were carried out to assess the extent to which the association between inflammation and aging phenotypes were driven by obesity, use of anti-inflammatory drugs and acute inflammation, by excluding, successively, obese participants (defined by a body mass index  $\geq 30$ ); users of anti-inflammatory medications; and participants with acute inflammation (C-reactive protein  $> 10$  mg/L). Models were adjusted for sex, age, socioeconomic status, smoking status, physical activity, acute inflammation and use of anti-inflammatory drugs.

†Interleukin-6 was measured twice (5 yr before baseline and at baseline); 0 = neither measurement was high, 1 = either measurement was high, 2 = both measurements were high.
